# Supplementary material for: Combining renal cell arrest and damage biomarkers to predict progressive AKI in patient with sepsis
Source: PubMed Central journal article supplement (PMC8672478; doi:10.1186/s12882-021-02611-8), 2021-12-15
Supplement: 12882_2021_2611_MOESM1_ESM.pdf [file 12882_2021_2611_MOESM1_ESM.pdf]

## Supplemental Material

**Table S1.** Performance of renal cell arrest and damage biomarkers for predicting septic AKI progression or AKI progression with death

| Outcomes                          | AUC   | 95%CI          | <i>P</i> <sup>a</sup> |
|-----------------------------------|-------|----------------|-----------------------|
| <b>AKI progression</b>            |       |                |                       |
| u[TIMP-2]*[IGFBP7]                | 0.745 | 0.667 to 0.823 | < 0.001               |
| uKIM-1                            | 0.719 | 0.638 to 0.800 | < 0.001               |
| uIL-18                            | 0.619 | 0.525 to 0.713 | 0.013                 |
| uACR                              | 0.631 | 0.541 to 0.720 | 0.004                 |
| <b>AKI progression with death</b> |       |                |                       |
| u[TIMP-2]*[IGFBP7]                | 0.777 | 0.700 to 0.854 | < 0.001               |
| uKIM-1                            | 0.738 | 0.653 to 0.822 | < 0.001               |
| uIL-18                            | 0.657 | 0.557 to 0.758 | 0.002                 |
| uACR                              | 0.642 | 0.547 to 0.737 | 0.004                 |

<sup>a</sup> Compared with 0.5.

AUC, area under the receiver-operating characteristic curve; CI, confidence interval; u[TIMP-2]\*[IGFBP7], urinary tissue inhibitor of metalloproteinase-2 and insulin-like growth factor-binding protein 7; uKIM-1, urinary kidney injury molecule-1; uIL-18, urinary Interleukin-18; uACR, urinary albumin to creatinine ratio.

**Table S2.** Analysis of risk reclassification of biomarkers over the clinical model for predicting AKI progression or AKI progression with death

| Outcomes                                            | Category-Free<br>NRI (95% CI) | <i>P</i> | NRI in Progressors<br>(95% CI) | <i>P</i> | NRI in Non-progressors<br>(95% CI) | <i>P</i> | IDI (95% CI)     | <i>P</i> |
|-----------------------------------------------------|-------------------------------|----------|--------------------------------|----------|------------------------------------|----------|------------------|----------|
| <b>AKI progression</b>                              |                               |          |                                |          |                                    |          |                  |          |
| Clinical risk factors                               | referent                      |          | referent                       |          | referent                           |          | referent         |          |
| Clinical risk factors<br>+u[TIMP-2]*[IGFBP7]        | 0.63 (0.31-0.94)              | <0.001   | 0.30 (0.06-0.54)               | 0.015    | 0.33 (0.12-0.53)                   | 0.002    | 0.08 (0.04-0.13) | <0.001   |
| Clinical risk factors +uKIM-1                       | 0.53 (0.21-0.86)              | 0.001    | 0.30 (0.06-0.54)               | 0.015    | 0.23 (0.02-0.44)                   | 0.030    | 0.09 (0.04-0.14) | <0.001   |
| Clinical risk factors +uIL-18                       | 0.31 (-0.02-0.64)             | 0.059    | 0.14 (-0.11-0.39)              | 0.260    | 0.16 (-0.05-0.38)                  | 0.132    | 0.02 (0.00-0.05) | 0.048    |
| Clinical risk factors<br>+u[TIMP-2]*[IGFBP7]+uKIM-1 | 0.61 (0.29-0.93)              | <0.001   | 0.33 (0.09-0.57)               | 0.007    | 0.28 (0.07-0.49)                   | 0.009    | 0.11 (0.05-0.16) | <0.001   |
| <b>AKI progression with death</b>                   |                               |          |                                |          |                                    |          |                  |          |
| Clinical risk factors                               | referent                      |          | referent                       |          | referent                           |          | referent         |          |
| Clinical risk factors<br>+u[TIMP-2]*[IGFBP7]        | 0.59 (0.25-0.94)              | <0.001   | 0.27 (-0.01-0.54)              | 0.063    | 0.33 (0.12-0.53)                   | 0.002    | 0.12 (0.06-0.18) | <0.001   |
| Clinical risk factors +uKIM-1                       | 0.56 (0.21-0.90)              | 0.002    | 0.35 (0.08-0.62)               | 0.014    | 0.21 (0.00-0.42)                   | 0.052    | 0.10 (0.05-0.16) | <0.001   |
| Clinical risk factors +uIL-18                       | 0.50 (0.15-0.85)              | 0.002    | 0.22 (-0.06-0.51)              | 0.117    | 0.28 (0.07-0.49)                   | 0.009    | 0.05 (0.01-0.10) | 0.006    |
| Clinical risk factors<br>+u[TIMP-2]*[IGFBP7]+uKIM-1 | 0.67 (0.33-1.01)              | <0.001   | 0.35 (0.08-0.62)               | 0.014    | 0.33 (0.12-0.53)                   | 0.002    | 0.13 (0.07-0.19) | <0.001   |

AKI progression is defined as worsening of AKI stage.

Clinical risk factors for AKI progression are comprised of age, gender, APACHE II, SCr at time of diagnosis, uACR at time of AKI diagnosis.

**Abbreviation:**

NRI, net reclassification improvement; IDI, integrated discrimination improvement. SCr, serum creatinine; uACR, urinary albumin to creatinine ratio.

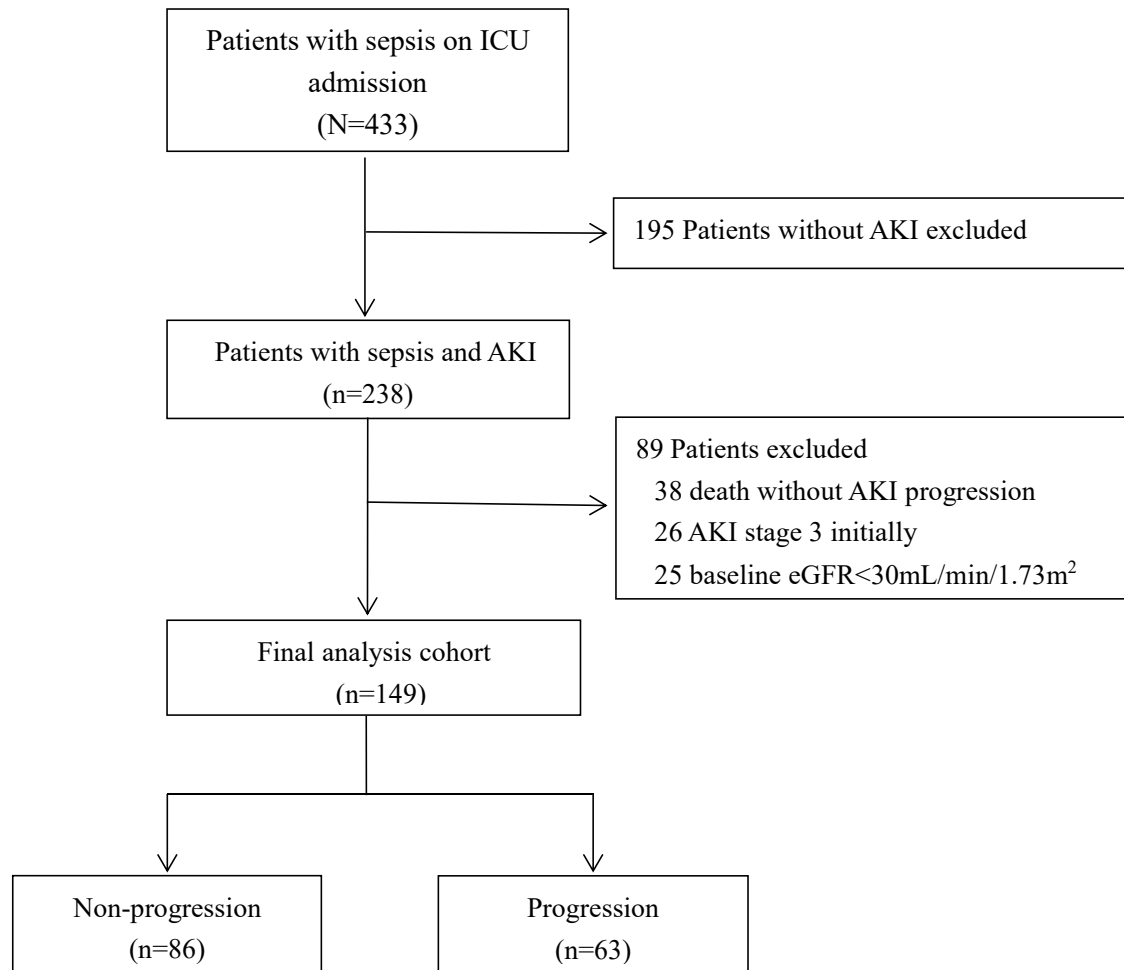

**Figure S1.** Flow chart of patient enrollment and exclusion.
